# Supplementary figures and images for: How to Transition Patients Back From Psychiatric Care to Primary Care: An Access Initiative Protocol Development
Source: Atypon-hosted journal article supplement (doi:10.1176/appi.ps.202100107), 2021-11-15

Figure 1. New Patient Referral Process

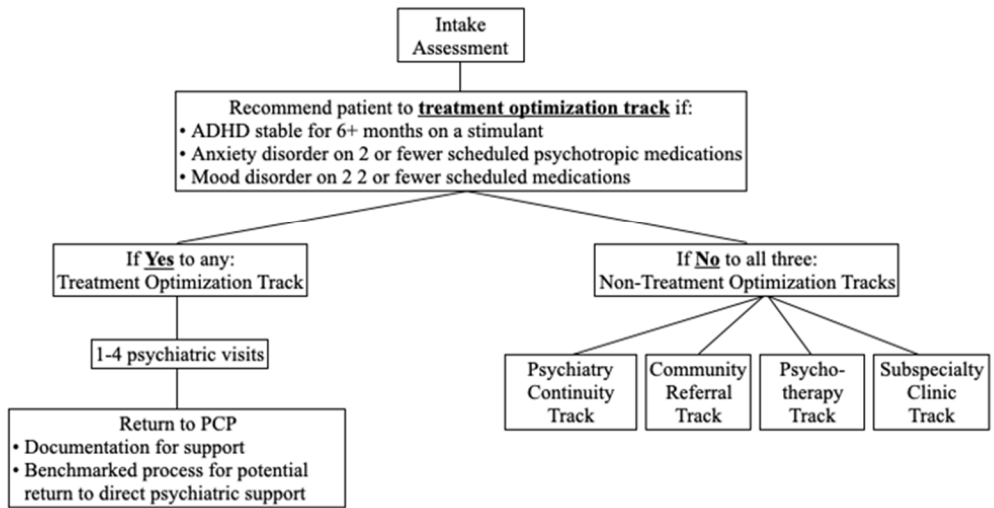

Supplement: appi.ps.202100107.ds001.pdf [file appi.ps.202100107.ds001.pdf]
